# Supplementary material
Source: HighWire-hosted journal article supplement (https://jcp.bmj.com/content/jcp-2023-208861)
Supplement: inline-supplementary-material-2 [file inline-supplementary-material-2.xlsx]

## Sheet: Sheet1
Supplemental Table 1: All Variants Identified by HRM and Sanger Sequencing
Mutations were identified by HRM in all 5 targets, confirmed by Sanger sequencing. The majority of variants consisted of the canonical JAK2 V617F with fewer mutations at other targets. Variant allele frequencies (VAF) ranged from <5% to 95%, and the fractional abundance (FA) of cases with VAF <5% was confirmed by droplet digital PCR (ddPCR). Specimens consisted of peripheral blood (PB, 90%) and b…
Target	Variant Identified	VAF	Variant Type	Variant Effect	Specimen	Detected by HRM	ddPCR (FA)
CALR exon 9	c.1090_1123del; p.E364Nfs*55	0.2	DEL	Pathogenic	PB	Yes
CALR exon 9	c.1099_1150del; p.L367fs*46	0.1	DEL	Pathogenic	PB	Yes
CALR exon 9	c.1099_1150del; p.L367fs*46	0.15	DEL	Pathogenic	BM	Yes
CALR exon 9	c.1099_1150del; p.L367fs*46	0.15	DEL	Pathogenic	PB	Yes
CALR exon 9	c.1099_1150del; p.L367fs*46	0.25	DEL	Pathogenic	BM	Yes
CALR exon 9	c.1099_1150del; p.L367fs*46	0.5	DEL	Pathogenic	BM	Yes
CALR exon 9	c.1099_1150del; p.L367fs*46	0.5	DEL	Pathogenic	PB	Yes
CALR exon 9	c.1099_1150del; p.L367fs*46	0.5	DEL	Pathogenic	PB	Yes
CALR exon 9	c.1099_1150del; p.L367fs*46	0.5	DEL	Pathogenic	PB	Yes
CALR exon 9	c.1099_1150del; p.L367fs*46	0.5	DEL	Pathogenic	PB	Yes
CALR exon 9	c.1099_1150del; p.L367fs*46	0.5	DEL	Pathogenic	PB	Yes
CALR exon 9	c.1099_1150del; p.L367fs*46	0.5	DEL	Pathogenic	PB	Yes
CALR exon 9	c.1101_1152del; p.K368Rfs*45	0.5	DEL	Pathogenic	PB	Yes
CALR exon 9	c.1102_1104del; p.K368del	0.5	DEL	Benign	PB	Yes
CALR exon 9	c.1122_1126delinsTTCTTGTCTT; p.K372Ffs	0.6	INDEL	Pathogenic	PB	Yes
CALR exon 9	c.1142_1144del; p.E381del	0.5	DEL	Benign	PB	Yes*
CALR exon 9	c.1154_1155insTTGTC; p.K385fs*47	0.5	INS	Pathogenic	PB	Yes
CALR exon 9	c.1154_1155insTTGTC; p.K385fs*47	0.5	INS	Pathogenic	PB	Yes
CALR exon 9	c.1154_1155insTTGTC; p.K385fs*47	0.5	INS	Pathogenic	PB	Yes
CALR exon 9	c.1191_1199del; p.E398_D400del	0.5	DEL	Benign	PB	Yes**
CALR exon 9	c.1191_1199del; p.E398_D400del	0.5	DEL	Benign	PB	Yes
CALR exon 9	c.1191_1199del; p.E398_D400del	0.5	DEL	Benign	PB	Yes
CALR exon 9	c.1191_1199del; p.E398_D400del	0.5	DEL	Benign	PB	Yes
CALR exon 9	c.1191_1199del; p.E398_D400del	0.5	DEL	Benign	PB	Yes
CALR exon 9	c.1191_1199del; p.E398_D400del	0.5	DEL	Benign	PB	Yes
MPL exon 10	c.1536G>A; p.L512=	0.5	SNV	Benign	PB	Yes
MPL exon 10	c.1544G>C; p.W515S	0.1	SNV	Pathogenic	PB	Yes
MPL exon 10	c.1544G>C; p.W515S	0.35	SNV	Pathogenic	BM	Yes
MPL exon 10	c.1544G>T; p.W515L	0.05	SNV	Pathogenic	PB	No
MPL exon 10	c.1544G>T; p.W515L	0.05	SNV	Pathogenic	PB	Yes
MPL exon 10	c.1544G>T; p.W515L	0.1	SNV	Pathogenic	BM	Yes
MPL exon 10	c.1544G>T; p.W515L	0.1	SNV	Pathogenic	PB	Yes
MPL exon 10	c.1544G>T; p.W515L	0.15	SNV	Pathogenic	PB	Yes
MPL exon 10	c.1544G>T; p.W515L	0.15	SNV	Pathogenic	PB	Yes
MPL exon 10	c.1544G>T; p.W515L	0.4	SNV	Pathogenic	PB	Yes
JAK2 exon 12	c.1641+6T>C; p.?	0.5	INTRONIC	Benign	BM	No
JAK2 exon 12	c.1641+6T>C; p.?	0.5	INTRONIC	Benign	PB	No
JAK2 exon 12	c.1641+6T>C; p.?	0.5	INTRONIC	Benign	PB	Yes
JAK2 exon 13	c.1686C>T; p.G562=	0.5	SNV	Benign	PB	Yes
JAK2 exon 13	c.1691G>T; p.R564L	0.5	SNV	VUS	PB	Yes***
JAK2 exon 13	c.1710C>T; p.Y570=	0.5	SNV	Benign	PB	Yes
JAK2 exon 13	c.1711G>A; p.G571S	0.5	SNV	VUS	PB	No
JAK2 exon 13	c.1711G>A; p.G571S	0.5	SNV	VUS	PB	Yes
JAK2 exon 14	c.1849G>T; p.V617F	<5%	SNV	Pathogenic	BM	Yes	0.07
JAK2 exon 14	c.1849G>T; p.V617F	<5%	SNV	Pathogenic	PB	Yes	0.05
JAK2 exon 14	c.1849G>T; p.V617F	<5%	SNV	Pathogenic	PB	Yes	0.07
JAK2 exon 14	c.1849G>T; p.V617F	<5%	SNV	Pathogenic	PB	Yes	0.08
JAK2 exon 14	c.1849G>T; p.V617F	<5%	SNV	Pathogenic	PB	Yes	0.1
JAK2 exon 14	c.1849G>T; p.V617F	0.05	SNV	Pathogenic	BM	Yes	0.1
JAK2 exon 14	c.1849G>T; p.V617F	0.05	SNV	Pathogenic	BM	Yes
JAK2 exon 14	c.1849G>T; p.V617F	0.05	SNV	Pathogenic	PB	Yes	0.09
JAK2 exon 14	c.1849G>T; p.V617F	0.05	SNV	Pathogenic	PB	Yes	0.08
JAK2 exon 14	c.1849G>T; p.V617F	0.05	SNV	Pathogenic	PB	Yes	0.1
JAK2 exon 14	c.1849G>T; p.V617F	0.05	SNV	Pathogenic	PB	Yes	0.06
JAK2 exon 14	c.1849G>T; p.V617F	0.05	SNV	Pathogenic	PB	Yes
JAK2 exon 14	c.1849G>T; p.V617F	0.05	SNV	Pathogenic	PB	Yes
JAK2 exon 14	c.1849G>T; p.V617F	0.05	SNV	Pathogenic	PB	Yes
JAK2 exon 14	c.1849G>T; p.V617F	0.05	SNV	Pathogenic	PB	Yes
JAK2 exon 14	c.1849G>T; p.V617F	0.05	SNV	Pathogenic	PB	Yes
JAK2 exon 14	c.1849G>T; p.V617F	0.05	SNV	Pathogenic	PB	Yes
JAK2 exon 14	c.1849G>T; p.V617F	0.05	SNV	Pathogenic	PB	Yes
JAK2 exon 14	c.1849G>T; p.V617F	0.05	SNV	Pathogenic	PB	Yes
JAK2 exon 14	c.1849G>T; p.V617F	0.1	SNV	Pathogenic	BM	Yes**
JAK2 exon 14	c.1849G>T; p.V617F	0.1	SNV	Pathogenic	BM	Yes***
JAK2 exon 14	c.1849G>T; p.V617F	0.1	SNV	Pathogenic	BM	Yes
JAK2 exon 14	c.1849G>T; p.V617F	0.1	SNV	Pathogenic	BM	Yes
JAK2 exon 14	c.1849G>T; p.V617F	0.1	SNV	Pathogenic	PB	No	0.14
JAK2 exon 14	c.1849G>T; p.V617F	0.1	SNV	Pathogenic	PB	Yes	0.09
JAK2 exon 14	c.1849G>T; p.V617F	0.1	SNV	Pathogenic	PB	Yes
JAK2 exon 14	c.1849G>T; p.V617F	0.1	SNV	Pathogenic	PB	Yes
JAK2 exon 14	c.1849G>T; p.V617F	0.1	SNV	Pathogenic	PB	Yes
JAK2 exon 14	c.1849G>T; p.V617F	0.1	SNV	Pathogenic	PB	Yes
JAK2 exon 14	c.1849G>T; p.V617F	0.1	SNV	Pathogenic	PB	Yes
JAK2 exon 14	c.1849G>T; p.V617F	0.1	SNV	Pathogenic	PB	Yes
JAK2 exon 14	c.1849G>T; p.V617F	0.1	SNV	Pathogenic	PB	Yes
JAK2 exon 14	c.1849G>T; p.V617F	0.1	SNV	Pathogenic	PB	Yes
JAK2 exon 14	c.1849G>T; p.V617F	0.1	SNV	Pathogenic	PB	Yes
JAK2 exon 14	c.1849G>T; p.V617F	0.1	SNV	Pathogenic	PB	Yes
JAK2 exon 14	c.1849G>T; p.V617F	0.1	SNV	Pathogenic	PB	Yes
JAK2 exon 14	c.1849G>T; p.V617F	0.1	SNV	Pathogenic	PB	Yes
JAK2 exon 14	c.1849G>T; p.V617F	0.1	SNV	Pathogenic	PB	Yes
JAK2 exon 14	c.1849G>T; p.V617F	0.1	SNV	Pathogenic	PB	Yes
JAK2 exon 14	c.1849G>T; p.V617F	0.1	SNV	Pathogenic	PB	Yes
JAK2 exon 14	c.1849G>T; p.V617F	0.1	SNV	Pathogenic	PB	Yes
JAK2 exon 14	c.1849G>T; p.V617F	0.1	SNV	Pathogenic	PB	Yes
JAK2 exon 14	c.1849G>T; p.V617F	0.15	SNV	Pathogenic	BM	Yes
JAK2 exon 14	c.1849G>T; p.V617F	0.15	SNV	Pathogenic	PB	Yes
JAK2 exon 14	c.1849G>T; p.V617F	0.15	SNV	Pathogenic	PB	Yes
JAK2 exon 14	c.1849G>T; p.V617F	0.15	SNV	Pathogenic	PB	Yes
JAK2 exon 14	c.1849G>T; p.V617F	0.15	SNV	Pathogenic	PB	Yes
JAK2 exon 14	c.1849G>T; p.V617F	0.15	SNV	Pathogenic	PB	Yes
JAK2 exon 14	c.1849G>T; p.V617F	0.15	SNV	Pathogenic	PB	Yes
JAK2 exon 14	c.1849G>T; p.V617F	0.15	SNV	Pathogenic	PB	Yes
JAK2 exon 14	c.1849G>T; p.V617F	0.15	SNV	Pathogenic	PB	Yes
JAK2 exon 14	c.1849G>T; p.V617F	0.15	SNV	Pathogenic	PB	Yes
JAK2 exon 14	c.1849G>T; p.V617F	0.15	SNV	Pathogenic	PB	Yes
JAK2 exon 14	c.1849G>T; p.V617F	0.2	SNV	Pathogenic	BM	Yes
JAK2 exon 14	c.1849G>T; p.V617F	0.2	SNV	Pathogenic	BM	Yes
JAK2 exon 14	c.1849G>T; p.V617F	0.2	SNV	Pathogenic	BM	Yes
JAK2 exon 14	c.1849G>T; p.V617F	0.2	SNV	Pathogenic	PB	Yes
JAK2 exon 14	c.1849G>T; p.V617F	0.2	SNV	Pathogenic	PB	Yes
JAK2 exon 14	c.1849G>T; p.V617F	0.2	SNV	Pathogenic	PB	Yes
JAK2 exon 14	c.1849G>T; p.V617F	0.2	SNV	Pathogenic	PB	Yes
JAK2 exon 14	c.1849G>T; p.V617F	0.2	SNV	Pathogenic	PB	Yes
JAK2 exon 14	c.1849G>T; p.V617F	0.2	SNV	Pathogenic	PB	Yes
JAK2 exon 14	c.1849G>T; p.V617F	0.2	SNV	Pathogenic	PB	Yes
JAK2 exon 14	c.1849G>T; p.V617F	0.2	SNV	Pathogenic	PB	Yes
JAK2 exon 14	c.1849G>T; p.V617F	0.25	SNV	Pathogenic	BM	Yes
JAK2 exon 14	c.1849G>T; p.V617F	0.25	SNV	Pathogenic	PB	Yes
JAK2 exon 14	c.1849G>T; p.V617F	0.25	SNV	Pathogenic	PB	Yes
JAK2 exon 14	c.1849G>T; p.V617F	0.25	SNV	Pathogenic	PB	Yes
JAK2 exon 14	c.1849G>T; p.V617F	0.3	SNV	Pathogenic	PB	Yes
JAK2 exon 14	c.1849G>T; p.V617F	0.35	SNV	Pathogenic	BM	Yes
JAK2 exon 14	c.1849G>T; p.V617F	0.35	SNV	Pathogenic	PB	Yes
JAK2 exon 14	c.1849G>T; p.V617F	0.35	SNV	Pathogenic	PB	Yes
JAK2 exon 14	c.1849G>T; p.V617F	0.35	SNV	Pathogenic	PB	Yes
JAK2 exon 14	c.1849G>T; p.V617F	0.4	SNV	Pathogenic	BM	Yes
JAK2 exon 14	c.1849G>T; p.V617F	0.45	SNV	Pathogenic	BM	Yes*
JAK2 exon 14	c.1849G>T; p.V617F	0.45	SNV	Pathogenic	BM	Yes	0.5
JAK2 exon 14	c.1849G>T; p.V617F	0.45	SNV	Pathogenic	BM	Yes
JAK2 exon 14	c.1849G>T; p.V617F	0.45	SNV	Pathogenic	PB	Yes
JAK2 exon 14	c.1849G>T; p.V617F	0.5	SNV	Pathogenic	BM	Yes
JAK2 exon 14	c.1849G>T; p.V617F	0.5	SNV	Pathogenic	BM	Yes
JAK2 exon 14	c.1849G>T; p.V617F	0.5	SNV	Pathogenic	PB	No
JAK2 exon 14	c.1849G>T; p.V617F	0.55	SNV	Pathogenic	BM	Yes
JAK2 exon 14	c.1849G>T; p.V617F	0.65	SNV	Pathogenic	BM	Yes
JAK2 exon 14	c.1849G>T; p.V617F	0.65	SNV	Pathogenic	BM	Yes
JAK2 exon 14	c.1849G>T; p.V617F	0.65	SNV	Pathogenic	PB	Yes
JAK2 exon 14	c.1849G>T; p.V617F	0.65	SNV	Pathogenic	PB	Yes
JAK2 exon 14	c.1849G>T; p.V617F	0.7	SNV	Pathogenic	PB	Yes
JAK2 exon 14	c.1849G>T; p.V617F	0.7	SNV	Pathogenic	PB	Yes
JAK2 exon 14	c.1849G>T; p.V617F	0.8	SNV	Pathogenic	BM	Yes	0.86
JAK2 exon 14	c.1849G>T; p.V617F	0.85	SNV	Pathogenic	PB	Yes
JAK2 exon 14	c.1849G>T; p.V617F	0.85	SNV	Pathogenic	PB	Yes
JAK2 exon 14	c.1849G>T; p.V617F	0.85	SNV	Pathogenic	PB	Yes
JAK2 exon 14	c.1849G>T; p.V617F	0.95	SNV	Pathogenic	BM	Yes
JAK2 exon 14	c.1849G>T; p.V617F	0.95	SNV	Pathogenic	PB	Yes	0.93
JAK2 exon 14	c.1849G>T; p.V617F	0.95	SNV	Pathogenic	PB	Yes
JAK2 exon 14	c.1849G>T; p.V617F	0.95	SNV	Pathogenic	PB	Yes
